# Supplementary material for: COVID-19 Patients in the COVID-19 Recovery and Engagement (CORE) Clinics in the Bronx
Source: MDPI journal article supplement (doi:10.3390/diagnostics13010119), 2022-12-30
Supplement: s1 [file s1]

**Supplementary Table S1.** Major lung imaging findings pre-, during and post-COVID-19 diagnosis broken down by hospitalization status. N reflects the number of unique patients. Post covid average 5 months after diagnosis (N=97). \* p<0.05, \*\*\* p<0.001

|                      | Pre-COVID-19 |                  | During-COVID-19 |                  | Post-COVID-19 |                  |
|----------------------|--------------|------------------|-----------------|------------------|---------------|------------------|
|                      | Hospitalized | Non-Hospitalized | Hospitalized    | Non-Hospitalized | Hospitalized  | Non-Hospitalized |
| Total N with imaging | 48           | 16               | 70              | 5                | 57            | 13               |
| No opacity           | 45           | 14               | 11 ***          | 4 ***            | 19 ***        | 11 ***           |
| Opacity              | 3            | 1                | 59 ***          | 1 ***            | 38 ***        | 2 ***            |
| Unilateral           | 1            | 1                | 7               | 1                | 9             | 0                |
| Bilateral            | 2            | 0                | 52              | 0                | 29 *          | 2 *              |
| No fibrosis          | 46 *         | 13 *             | 69              | 5                | 45            | 11               |
| Fibrosis             | 2 *          | 3 *              | 1               | 0                | 12            | 2                |
